# Supplementary material
Source: PubMed Central journal article supplement (PMC2993366)
Supplement: 1014509107_pnas.201014509SI.pdf [file 1014509107_pnas.201014509SI.pdf]

# Supporting Information

Hargett and Shenk 10.1073/pnas.1014509107

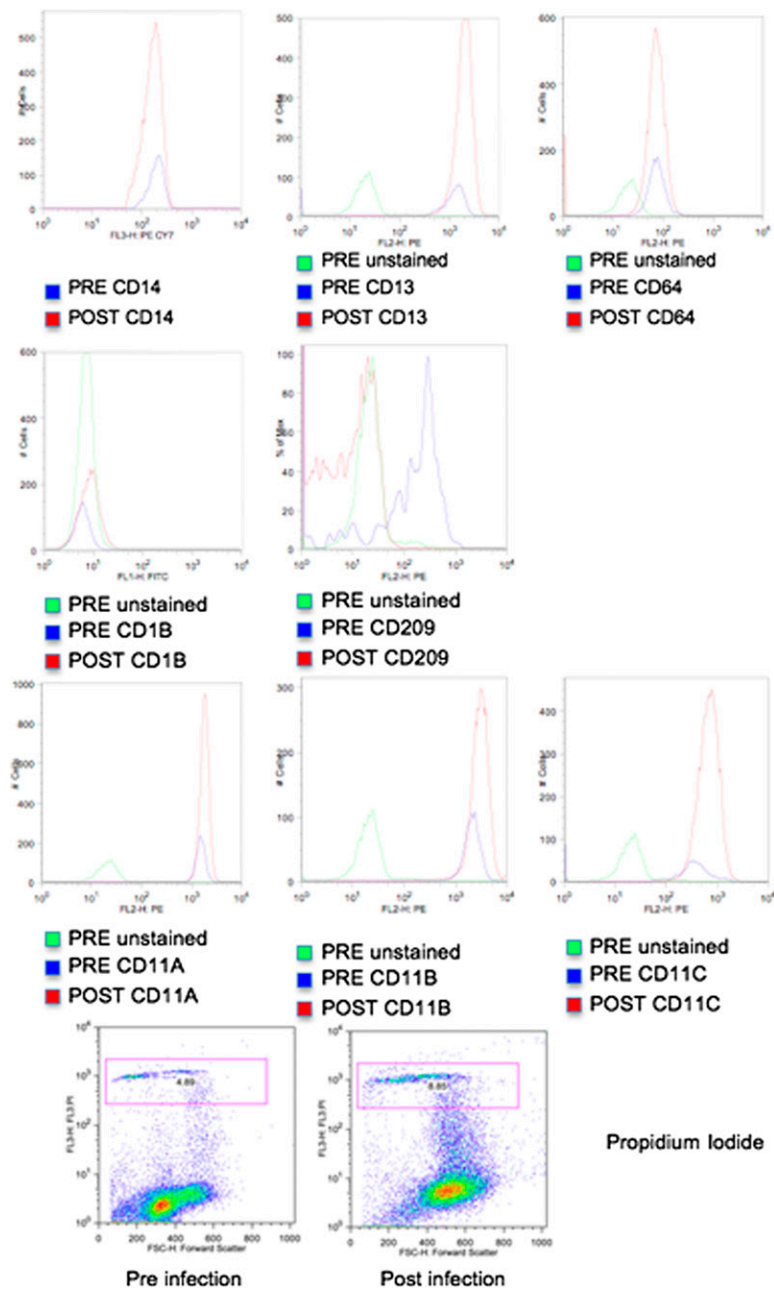

**Fig. S1.** Isolation of monocytes does not affect their differentiation status. Whole peripheral blood mononuclear cell populations (PRE; blue) and CD14<sup>+</sup> monocytes isolated from these populations (POST; red) were analyzed by flow cytometry using the indicated antibodies to analyze cell surface markers. Similar concentrations of dead cells were observed before and after isolation (5% and 9%, respectively, calculated by propidium iodine staining). Unstained control sorts are depicted in green.

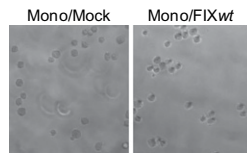

**Fig. S2.** Infection with the FIX clinical isolate does not alter the morphology of cultured monocytes. Cells were visualized by phase microscopy.

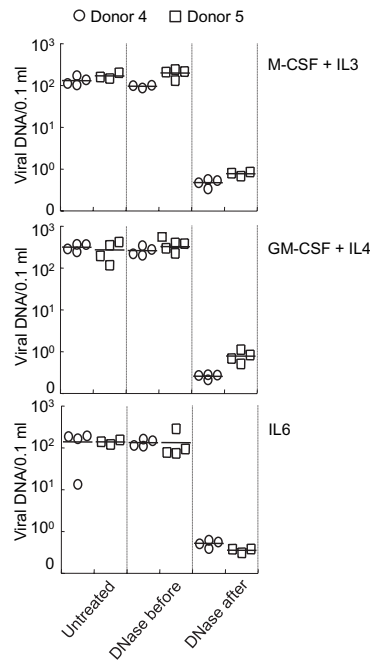

**Fig. S3.** Viral DNA in the medium of differentiated monocytes is protected from digestion with DNase I. Supernatants from monocytes (Fig. 5B, donors 4 and 5) were collected. Viral DNA was isolated with no prior treatment (untreated), after treatment with DNase I but before virions were disrupted with SDS and proteinase K (DNase before), or after treatment with DNase I but after virions were disrupted (DNase after). DNA in the samples was then quantified by quantitative PCR (qPCR) using a primer amplifying a portion of the UL123 ORF. DNA samples were analyzed in quadruplicate; each determination is presented (circles for donor 4 and squares for donor 5), and the mean is indicated with a horizontal bar.

**Table S1. Primers used for quantitative PCR assays**

| Gene                    | Primer sequence                                              |
|-------------------------|--------------------------------------------------------------|
| UL138                   | 5'-TGCGCATGTTTCTGAGCTAC-3'<br>5'-ACGGGTTTCAACAGATCGAC-3'     |
| UL82 (LUNA PCR round 1) | 5'-ATGACCTCTCCTCCACACC-3'<br>5'-GACGCTATATTTAGGGCTTCC-3'     |
| UL81 (LUNA PCR round 2) | 5'-GAGCCTTGACGACTTGGTAC-3'<br>5'-GGAAAAACACGCGGGGA-3'        |
| UL122                   | 5'-ATGGTTTTGCAGGCTTGATG-3'<br>5'-ACCTGCCCTTACGATTCC-3'       |
| UL123                   | 5'-GCCTTCCTAAGACCACCAAT-3'<br>5'-ATTTTCTGGGCATAAGCCATAATC-3' |
| UL54                    | 5'-CCCTCGGCTTCTACAACAAT-3'<br>5'-CGAGTTAGTCTTGCCATGCAT-3'    |
| UL94                    | 5'-AGAGCCGAAAACACCGC-3'<br>5'-TCCGGACTAAAGATCGTCGAA-3'       |
| GAPDH                   | 5'-ACCCACTCCTCCACCTTTGAC-3'<br>5'-CTGTTGCTGTAGCCAAATTCGT-3'  |
| $\beta$ -actin          | 5'-CATTGCCGACGGATGCA-3'<br>5'-GCCGATCCACACGGAGTACT-3'        |
| vIL-10                  | 5'-TGTTGAGCGGTATCTGGAGA-3'<br>5'-CCGTCTTGAGTCCGGGATAG-3'     |
| US28                    | 5'-TTTGGTGGATCTTGCCGTG-3'<br>5'-ACGAAAGCACCAAGCATGAGTTC-3'   |
